# Supplementary material for: Tasquinimod suppresses tumor cell growth and bone resorption by targeting immunosuppressive myeloid cells and inhibiting c-MYC expression in multiple myeloma
Source: PubMed Central journal article supplement — J Immunother Cancer. 2023 Jan 17;11(1):e005319. doi: 10.1136/jitc-2022-005319 (PMC9853259; doi:10.1136/jitc-2022-005319), 2023-01-17
Supplement: jitc-2022-005319supp002.pdf [file jitc-2022-005319supp002.pdf]

## Tasquinimod Suppresses Tumor Cell Growth and Bone Resorption by Targeting Immunosuppressive Myeloid Cells and Inhibiting c-MYC Expression in Multiple Myeloma

Rong Fan<sup>1</sup>, Hatice Satilmis<sup>1</sup>, Niels Vandewalle<sup>1</sup>, Emma Verheye<sup>1,2</sup>, Philip Vlummens<sup>1,3</sup>, Anke Maes<sup>1</sup>, Catharina Muylaert<sup>1</sup>, Elke De Bruyne<sup>1</sup>, Eline Menu<sup>1</sup>, Holly Evans<sup>4</sup>, Andrew Chantry<sup>4</sup>, Nathan De Beule<sup>5</sup>, Dirk Hose<sup>1</sup>, Marie Törngren<sup>6</sup>, Helena Eriksson<sup>6</sup>, Karin Vanderkerken<sup>1</sup>, Ken Maes<sup>7</sup>, Karine Breckpot<sup>8</sup>, Kim De Veirman<sup>1</sup>

### Supplementary Material and Methods

#### Reagents

Recombinant mouse IL-10 (#575804, biolegend) was used at a concentration of 100 ng/mL for the T cell suppression assay. The HDAC inhibitor panobinostat (LBH589, Novartis Pharmaceuticals) was purchased from Selleckchem (East Hanover, NJ) and prepared as a 10 mM stock solution in dimethylsulfoxide and stored at -80°C.

#### Gene expression data

The online webtool GenomicScape (<http://genomicscape.com/microarray/survival.php>) was consulted for the microarray data of the TT2 cohort (accession number: GSE204225, <http://www.ncbi.nlm.nih.gov/geo/>). Gene expression of HDAC4 was analyzed in bone marrow plasma cells (BMPCs) of healthy individuals (n = 22) and in patient samples at different MM substages including monoclonal gammopathy of undetermined clinical significance (MGUS) (n = 44), smoldering multiple myeloma (SMM) (n = 12) and CD138<sup>+</sup> cells of newly diagnosed MM patients (n = 345) and primary MM cell lines (n = 23). Gene expression data were normalized with the MAS5 algorithm.

#### Cell culture

MM cell lines were seeded at a concentration of  $2.5 \times 10^5$  cells/mL with different concentrations of tasquinimod (10, 25  $\mu$ M) for 3 days and 5 days in 1% FCS RPMI medium. Apoptosis was measured by flow cytometry using the Annexin-V/7-AAD staining. MM cell lines were seeded at a concentration of  $5.0 \times 10^5$  cells/mL with different concentrations of panobinostat (0.5, 1  $\mu$ M) for 6 h and 24 h.

#### Cell viability

CD11b<sup>+</sup> cells were sorted from 5TGM1 model and 5T33MM model by CD11b microbeads and seeded in a white, opaque 96-well plate. The following day, cells were treated with tasquinimod and cell viability was measured at 24 h post-treatment using the CellTiter-Glo<sup>®</sup> Luminescent Cell Viability Assay (Promega, G7573)

according to manufacturer's instructions. Microplate luminescence was measured using a CLARIOstar (BMG Labtech) plate reader. All data were normalized to non-treated controls.

**Supplementary Table 1. Mouse primer sequences of genes evaluated by real-time quantitative PCR**

| <b>Gene</b>         |         | <b>Primer sequence 5'-3'</b>  |
|---------------------|---------|-------------------------------|
| <b><i>Abl</i></b>   | Forward | CCG TGG GTG CCA CTA TAT TT    |
|                     | Reverse | GGG CAC AGT GGT GAA CTA TT    |
| <b><i>Arg1</i></b>  | Forward | ACA GCA AAG CAG ACA GAA CTA   |
|                     | Reverse | GAA AGG AAC TGC TGG GAT ACA   |
| <b><i>Fizz1</i></b> | Forward | CCC AGT GAA TAC TGA TGA GAC C |
|                     | Reverse | GGA GGG ATA GTT AGC TGG ATT G |
| <b><i>Mrc1</i></b>  | Forward | GGA ATC AAG GGC ACA GAG TTA   |
|                     | Reverse | TTC CAT CTG CTC CAC AAT CC    |
| <b><i>Nos2</i></b>  | Forward | GGA ATC TTG GAG CGA GTT GT    |
|                     | Reverse | CCT CTT GTC TTT GAC CCA GTA G |
| <b><i>Stab1</i></b> | Forward | ACG GGA AAC TGC TTG ATG TC    |
|                     | Reverse | ACT CAG CGT CAT GTT GTC CA    |
| <b><i>Tnfa</i></b>  | Forward | CTA CCT TGT TGC CTC CTC TTT   |
|                     | Reverse | GAG CAG AGG TTC AGT GAT GTA G |
| <b><i>IL10</i></b>  | Forward | TTG AAT TCC CTG GGT GAG AAG   |
|                     | Reverse | TCC ACT GCC TTG CTC TTA TTT   |
| <b><i>c-Myc</i></b> | Forward | GCT GTT TGA AGG CTG GAT TTC   |
|                     | Reverse | GAG TCG TAG TCG AGG TCA TAG T |

**Supplementary Table 2. Differentially expressed genes in LP-1 cells treated with tasquinimod.** Using RNA sequencing, we identified a list of upregulated and downregulated genes in LP-1 cells treated with tasquinimod (25 µM) for 6 h and 24 h ( $\text{padj} \leq 0.05$  &  $|\log_2\text{FoldChange}| \geq 1$ ) (n=3).

| Up regulated genes in TasQ treated LP-1 (6 h)   |             |            |                |         |         |           |           |          |         |         |         |         |         |
|-------------------------------------------------|-------------|------------|----------------|---------|---------|-----------|-----------|----------|---------|---------|---------|---------|---------|
| Ensembl ID                                      | Gene symbol | baseMean   | log2FoldChange | lfcSE   | stat    | pvalue    | padj      | Cnt1     | Cnt2    | Cnt3    | Tas1    | Tas2    | Tas3    |
| ENSG00000143153                                 | ATP1B1      | 103.621196 | 1.018170392    | 0.19703 | 5.16752 | 2.37E-07  | 4.03E-06  | 69.38256 | 72.4779 | 64.0296 | 143.197 | 118.881 | 153.76  |
| ENSG00000125266                                 | EFNB2       | 86.3883412 | 1.035125581    | 0.21339 | 4.85077 | 1.23E-06  | 1.79E-05  | 64.20476 | 55.4909 | 50.5022 | 127.611 | 113.927 | 106.594 |
| ENSG00000107074                                 | HFE         | 104.822284 | 1.08717393     | 0.21785 | 4.99036 | 6.03E-07  | 9.48E-06  | 67.31144 | 57.7558 | 75.7533 | 106.18  | 143.647 | 178.286 |
| ENSG00000154309                                 | DISP1       | 64.3172858 | 1.102929222    | 0.24203 | 4.55691 | 5.19E-06  | 6.59E-05  | 41.42243 | 39.6364 | 41.4839 | 91.5681 | 81.2351 | 90.5578 |
| ENSG0000050405                                  | LIMA1       | 86.8832765 | 1.174777021    | 0.2192  | 5.35946 | 8.35E-08  | 1.55E-06  | 43.49355 | 50.961  | 64.9314 | 118.844 | 131.759 | 111.311 |
| ENSG00000076641                                 | PAG1        | 354.290158 | 1.307707212    | 0.11141 | 11.7373 | 8.20E-32  | 1.80E-29  | 187.4365 | 220.831 | 203.812 | 513.366 | 521.094 | 479.202 |
| ENSG00000196083                                 | IL1RAP      | 83.2898715 | 1.415285922    | 0.222   | 6.37525 | 1.83E-10  | 5.31E-09  | 40.38687 | 44.1662 | 51.404  | 116.895 | 112.937 | 133.95  |
| ENSG00000164741                                 | DLC1        | 74.4918423 | 1.448455883    | 0.23361 | 6.20023 | 5.64E-10  | 1.50E-08  | 39.35131 | 41.9013 | 38.7785 | 104.232 | 100.058 | 122.63  |
| ENSG00000197019                                 | SERTAD1     | 59.4743365 | 1.608127034    | 0.26411 | 6.08879 | 1.14E-09  | 2.84E-08  | 25.88902 | 30.5766 | 31.5639 | 95.4646 | 94.1139 | 79.2381 |
| Down regulated genes in TasQ treated LP-1 (6 h) |             |            |                |         |         |           |           |          |         |         |         |         |         |
| Ensembl ID                                      | Gene symbol | baseMean   | log2FoldChange | lfcSE   | stat    | pvalue    | padj      | Cnt1     | Cnt2    | Cnt3    | Tas1    | Tas2    | Tas3    |
| ENSG00000169245                                 | CXCL10      | 1555.72273 | -1.726671085   | 0.06807 | -25.364 | 6.22E-142 | 7.38E-138 | 2396.287 | 2307.97 | 2462.88 | 782.225 | 734.088 | 650.884 |
| ENSG00000168329                                 | CX3CR1      | 80.4909195 | -1.690891097   | 0.22995 | -7.3534 | 1.93E-13  | 8.30E-12  | 125.3028 | 114.379 | 128.961 | 30.198  | 42.5989 | 41.5057 |
| ENSG00000168334                                 | XIRP1       | 465.496837 | -1.657655626   | 0.10225 | -16.212 | 4.14E-59  | 4.15E-56  | 716.608  | 756.488 | 648.412 | 225.998 | 221.911 | 223.555 |
| ENSG00000183625                                 | CCR3        | 219.756282 | -1.597770032   | 0.13972 | -11.436 | 2.77E-30  | 5.39E-28  | 303.4193 | 343.138 | 344.497 | 110.076 | 107.983 | 109.424 |
| ENSG00000076356                                 | PLXNA2      | 514.954525 | -1.388409651   | 0.09444 | -14.701 | 6.35E-49  | 4.19E-46  | 794.275  | 738.369 | 703.423 | 289.316 | 281.351 | 282.993 |
| ENSG00000128917                                 | DLL4        | 245.673963 | -1.350305566   | 0.13494 | -10.007 | 1.43E-23  | 1.84E-21  | 385.2286 | 349.932 | 323.755 | 151.964 | 137.703 | 125.46  |
| ENSG00000169085                                 | VXN         | 98.0317411 | -1.333117655   | 0.20855 | -6.3922 | 1.63E-10  | 4.77E-09  | 128.4095 | 157.413 | 135.274 | 63.3183 | 59.4403 | 44.3356 |
| ENSG00000223863                                 | LINC01805   | 153.07184  | -1.319443666   | 0.16739 | -7.8823 | 3.21E-15  | 1.77E-13  | 225.7522 | 210.639 | 219.143 | 105.206 | 82.2258 | 75.4648 |
| ENSG00000232591                                 | LINC02642   | 56.6622161 | -1.20975926    | 0.26068 | -4.6409 | 3.47E-06  | 4.56E-05  | 86.9871  | 69.0805 | 81.1642 | 36.0427 | 33.6829 | 33.0159 |
| ENSG00000221869                                 | CEBPD       | 51.026088  | -1.192533363   | 0.27693 | -4.3063 | 1.66E-05  | 0.0001819 | 82.84485 | 67.948  | 62.2259 | 32.1462 | 32.6922 | 28.2993 |
| ENSG00000165970                                 | SLC6A5      | 74.8623777 | -1.190963311   | 0.22891 | -5.2027 | 1.96E-07  | 3.42E-06  | 97.3427  | 107.584 | 107.317 | 50.6547 | 48.5429 | 37.7324 |
| ENSG00000107984                                 | DKK1        | 49.7665669 | -1.185073346   | 0.29999 | -3.9504 | 7.80E-05  | 0.0007194 | 59.02696 | 82.6701 | 65.8332 | 42.8616 | 21.7948 | 26.4127 |
| ENSG00000100368                                 | CSF2RB      | 130.748422 | -1.145159047   | 0.1747  | -6.5549 | 5.57E-11  | 1.71E-09  | 190.5432 | 171.003 | 178.561 | 92.5422 | 78.2631 | 73.5782 |
| ENSG00000053918                                 | KCNQ1       | 54.4190729 | -1.119346433   | 0.26799 | -4.1768 | 2.96E-05  | 0.0003028 | 83.88041 | 70.213  | 69.4405 | 33.1204 | 40.6176 | 29.2426 |
| ENSG00000178965                                 | ERIC3       | 214.922947 | -1.117761094   | 0.13701 | -8.1583 | 3.40E-16  | 2.05E-14  | 280.6369 | 294.441 | 307.522 | 148.067 | 126.806 | 132.063 |
| ENSG00000184828                                 | ZBTB7C      | 67.6005665 | -1.112931413   | 0.24167 | -4.6052 | 4.12E-06  | 5.36E-05  | 88.02266 | 101.922 | 87.477  | 37.991  | 51.515  | 38.6757 |
| ENSG00000181291                                 | TMEM132E    | 277.330627 | -1.11026495    | 0.12427 | -8.9342 | 4.10E-19  | 3.40E-17  | 382.1219 | 412.218 | 343.595 | 181.188 | 169.405 | 175.456 |
| ENSG00000163823                                 | CCR1        | 1203.27605 | -1.109650045   | 0.06845 | -16.211 | 4.19E-59  | 4.15E-56  | 1699.355 | 1688.51 | 1546.63 | 801.708 | 742.013 | 741.442 |
| ENSG00000053108                                 | FSTL4       | 177.824507 | -1.095425979   | 0.15829 | -6.9204 | 4.50E-12  | 1.63E-10  | 201.9343 | 270.66  | 254.315 | 120.792 | 106.993 | 112.254 |
| ENSG00000127831                                 | VIL1        | 222.089259 | -1.07598418    | 0.14052 | -7.6574 | 1.90E-14  | 8.96E-13  | 289.957  | 274.057 | 339.086 | 131.507 | 154.545 | 143.383 |
| ENSG00000185862                                 | EVI2B       | 369.016225 | -1.030782678   | 0.10822 | -9.5251 | 1.65E-21  | 1.79E-19  | 478.429  | 483.563 | 523.96  | 263.989 | 237.761 | 226.395 |

| Up regulated genes in TasQ treated LP-1 (24 h)   |             |            |                |         |         |           |           |          |            |            |            |           |            |
|--------------------------------------------------|-------------|------------|----------------|---------|---------|-----------|-----------|----------|------------|------------|------------|-----------|------------|
| Ensembl ID                                       | Gene symbol | baseMean   | log2FoldChange | lfcSE   | stat    | pvalue    | padj      | Cnt1     | Cnt2       | Cnt3       | Tas1       | Tas2      | Tas3       |
| ENSG00000139112                                  | GABARAPL1   | 38.3711148 | 1.094614799    | 0.31661 | 3.45729 | 0.0005456 | 0.0039602 | 24.33034 | 24.4594    | 24.7579    | 45.0197    | 58.41     | 53.2493    |
| ENSG00000084444                                  | FAM234B     | 38.3419731 | 1.087872499    | 0.31504 | 3.45311 | 0.0005542 | 0.0040157 | 26.54219 | 25.4001    | 21.7869    | 48.3139    | 54.7594   | 53.2493    |
| ENSG00000144642                                  | RBMS3       | 38.3906879 | 1.200500052    | 0.32691 | 3.67228 | 0.0002404 | 0.0019633 | 17.6948  | 29.1631    | 22.7772    | 46.1178    | 52.9341   | 61.6571    |
| ENSG00000084764                                  | MAPRE3      | 35.7753684 | 1.285215457    | 0.33334 | 3.85558 | 0.0001155 | 0.0010567 | 22.11849 | 24.4594    | 15.845     | 51.608     | 51.1088   | 49.5125    |
| ENSG00000204397                                  | CARD16      | 38.9500164 | 1.047412393    | 0.32858 | 3.18768 | 0.0014342 | 0.0088204 | 25.43627 | 31.9854    | 18.816     | 45.0197    | 64.7986   | 47.6441    |
| ENSG00000130589                                  | HELZ2       | 44.7308589 | 1.02031668     | 0.30959 | 3.29574 | 0.0009816 | 0.0064715 | 29.85997 | 24.4594    | 34.661     | 42.8236    | 71.1872   | 65.3939    |
| ENSG00000143603                                  | KCNC3       | 39.9964207 | 1.667010993    | 0.35299 | 4.7225  | 2.33E-06  | 3.40E-05  | 11.05925 | 28.2224    | 17.8257    | 46.1178    | 63.886    | 72.8675    |
| ENSG00000122694                                  | GLIPR2      | 40.7785087 | 1.212019906    | 0.34992 | 3.46372 | 0.0005328 | 0.0038849 | 22.11849 | 15.0519    | 36.6416    | 60.3923    | 69.3619   | 41.1047    |
| ENSG00000152778                                  | IFIT5       | 56.0192944 | 1.073961253    | 0.26541 | 4.0465  | 5.20E-05  | 0.0005323 | 42.02514 | 37.6298    | 28.7191    | 79.059     | 73.0126   | 75.6701    |
| ENSG00000185272                                  | RBM11       | 24.9968283 | 1.209443943    | 0.39208 | 3.0847  | 0.0020376 | 0.011871  | 15.48295 | 15.9927    | 13.8644    | 30.7452    | 35.9936   | 38.3021    |
| ENSG00000198133                                  | TMEM229B    | 22.896663  | 1.072243037    | 0.40585 | 2.64194 | 0.0082432 | 0.0370817 | 14.37702 | 14.1112    | 15.845     | 27.4511    | 31.0303   | 34.5653    |
| ENSG00000115596                                  | WNT6        | 24.9742134 | 1.024565383    | 0.3904  | 2.62439 | 0.0086804 | 0.0387148 | 17.6948  | 18.8149    | 12.8741    | 34.0393    | 35.9936   | 30.8286    |
| ENSG00000164440                                  | TXLNB       | 23.1095368 | 1.486864327    | 0.42398 | 3.50694 | 0.0004533 | 0.0033764 | 12.16517 | 8.46671    | 15.845     | 38.4315    | 30.1177   | 33.6311    |
| ENSG00000107931                                  | MOXD1       | 31.486598  | 1.027573766    | 0.35121 | 2.92581 | 0.0034357 | 0.018275  | 18.80072 | 22.5779    | 20.7966    | 37.3334    | 51.1088   | 38.3021    |
| ENSG00000114626                                  | ABTB1       | 27.6180976 | 1.009163945    | 0.38629 | 2.61246 | 0.0089892 | 0.0398996 | 17.6948  | 24.4594    | 12.8741    | 28.5491    | 42.8949   | 39.2363    |
| ENSG00000169851                                  | PCDH7       | 33.3543784 | 1.29059107     | 0.35912 | 3.59377 | 0.0003259 | 0.0025422 | 18.80072 | 23.5186    | 15.845     | 34.0393    | 58.41     | 49.5125    |
| ENSG00000123609                                  | NMI         | 98.9780823 | 1.302167082    | 0.20248 | 6.43094 | 1.27E-10  | 4.68E-09  | 54.19031 | 51.741     | 65.3608    | 142.745    | 136.899   | 142.932    |
| ENSG00000126821                                  | SGPP1       | 98.7357042 | 1.030442916    | 0.21124 | 4.87814 | 1.07E-06  | 1.71E-05  | 50.87254 | 83.7264    | 59.4189    | 130.667    | 135.073   | 132.656    |
| ENSG00000212443                                  | SNORA53     | 86.940508  | 1.182301894    | 0.24177 | 4.89028 | 1.01E-06  | 1.63E-05  | 40.91921 | 46.0965    | 72.293     | 115.294    | 101.305   | 145.735    |
| ENSG00000168234                                  | TTC39C      | 108.035083 | 1.397721754    | 0.19968 | 6.99969 | 2.57E-12  | 1.26E-10  | 60.82586 | 55.504     | 62.3898    | 135.059    | 158.802   | 175.629    |
| ENSG00000137177                                  | KIF13A      | 65.0820315 | 2.083882597    | 0.26447 | 7.87937 | 3.29E-15  | 2.60E-13  | 24.33034 | 23.5186    | 26.7385    | 98.8238    | 104.043   | 113.038    |
| ENSG00000173530                                  | TNFRSF10D   | 158.126012 | 1.023609848    | 0.16072 | 6.36871 | 1.91E-10  | 6.86E-09  | 103.9569 | 111.949    | 97.0508    | 196.55     | 229.99    | 209.26     |
| ENSG00000184500                                  | PROS1       | 155.449464 | 1.13167493     | 0.17774 | 6.36691 | 1.93E-10  | 6.92E-09  | 79.62658 | 111.008    | 101.012    | 209.726    | 249.155   | 182.169    |
| ENSG00000136842                                  | TMOD1       | 164.547344 | 1.347966482    | 0.16243 | 8.29886 | 1.05E-16  | 1.01E-14  | 94.0036  | 85.6079    | 99.0315    | 238.275    | 257.369   | 212.997    |
| ENSG00000105354                                  | PON2        | 149.826755 | 1.161267053    | 0.16487 | 7.04344 | 1.88E-12  | 9.37E-11  | 96.21545 | 90.3116    | 91.109     | 225.099    | 192.517   | 203.655    |
| ENSG00000185112                                  | FAM43A      | 128.07146  | 1.082939209    | 0.18293 | 5.91984 | 3.22E-09  | 8.95E-08  | 84.05028 | 82.7856    | 79.2252    | 199.844    | 148.763   | 173.761    |
| ENSG00000223247                                  | RNU2-64P    | 123.411963 | 1.043965427    | 0.19258 | 5.42084 | 5.93E-08  | 1.27E-06  | 76.30881 | 76.2004    | 89.1283    | 171.295    | 134.161   | 193.379    |
| ENSG00000182568                                  | SATB1       | 326.140889 | 1.1039324      | 0.11648 | 9.47759 | 2.60E-21  | 4.41E-19  | 211.2316 | 210.727    | 200.044    | 405.178    | 469.106   | 466.56     |
| ENSG00000173706                                  | HEG1        | 315.566233 | 1.048705617    | 0.14871 | 7.05181 | 1.77E-12  | 8.92E-11  | 162.5709 | 214.49     | 239.656    | 342.589    | 439.901   | 494.191    |
| ENSG00000129757                                  | CDKN1C      | 247.077386 | 1.13441816     | 0.13693 | 8.28465 | 1.18E-16  | 1.12E-14  | 171.4183 | 142.995    | 150.528    | 315.138    | 322.168   | 380.219    |
| ENSG00000099954                                  | CECR2       | 232.514568 | 1.14131831     | 0.15895 | 7.18032 | 6.95E-13  | 3.71E-11  | 190.2191 | 130.764    | 115.867    | 288.785    | 332.207   | 337.246    |
| ENSG00000166641                                  | PAG1        | 414.236923 | 1.053885463    | 0.10297 | 10.235  | 1.38E-24  | 3.05E-22  | 266.5279 | 270.935    | 270.356    | 557.805    | 527.516   | 592.282    |
| ENSG00000104081                                  | BMF         | 2184.0285  | 1.331990767    | 0.0615  | 21.6597 | 4.92E-104 | 2.28E-100 | 1143.526 | 1314.22    | 1265.62    | 3000.95    | 3197.04   | 3182.81    |
| ENSG00000135925                                  | WNT10A      | 1146.39434 | 1.065875055    | 0.06988 | 15.2524 | 1.59E-52  | 2.75E-49  | 757.5584 | 713.085    | 754.62     | 1469.18    | 1615.4    | 1568.52    |
| ENSG00000159388                                  | BTG2        | 3761.03942 | 1.101356129    | 0.049   | 22.476  | 1.73E-112 | 4.95E-108 | 2490.542 | 2294.48    | 2391.61    | 5117.97    | 5219.48   | 5052.15    |
| Down regulated genes in TasQ treated LP-1 (24 h) |             |            |                |         |         |           |           |          |            |            |            |           |            |
| Ensembl ID                                       | Gene symbol | baseMean   | log3FoldChange | lfcSE   | stat    | pvalue    | padj      | Cnt1     | Cnt2       | Cnt3       | Tas1       | Tas2      | Tas3       |
| ENSG00000213262                                  | VDAC2P3     | 57.7394309 | -1.354138043   | 0.26711 | -5.0696 | 3.99E-07  | 7.16E-06  | 88.47398 | 68.6744    | 92.0993    | 30.7452    | 34.681    | 31.7627    |
| ENSG00000100368                                  | CSF2RB      | 57.1941831 | -1.508054408   | 0.26866 | -5.6132 | 1.99E-08  | 4.75E-07  | 89.5799  | 81.8449    | 82.1961    | 35.1373    | 30.1177   | 24.2892    |
| ENSG00000170442                                  | KRT86       | 48.7800833 | -1.516178725   | 0.29138 | -5.2034 | 1.96E-07  | 3.81E-06  | 71.88511 | 63.9707    | 81.2058    | 23.0589    | 29.205    | 23.355     |
| ENSG00000184408                                  | KCND2       | 46.7007639 | -2.228640509   | 0.33568 | -6.6391 | 3.16E-11  | 1.27E-09  | 86.26213 | 61.1485    | 83.1864    | 20.8628    | 9.12657   | 19.6182    |
| ENSG00000169085                                  | VXN         | 63.9637778 | -1.712894755   | 0.26951 | -6.3556 | 2.08E-10  | 7.39E-09  | 116.1221 | 95.9561    | 82.1961    | 29.6471    | 36.5063   | 23.355     |
| ENSG00000205426                                  | KRT81       | 55.2654673 | -2.318266133   | 0.29319 | -7.907  | 2.64E-15  | 2.10E-13  | 95.10953 | 91.2523    | 90.1186    | 15.3726    | 18.2531   | 21.4866    |
| ENSG0000017483                                   | SLC38A5     | 71.2630185 | -1.339466175   | 0.23771 | -5.6348 | 1.75E-08  | 4.23E-07  | 98.4273  | 95.0153    | 112.896    | 42.8326    | 41.9622   | 36.4337    |
| ENSG00000165912                                  | PAC1N3      | 97.1483993 | -1.077000373   | 0.21803 | -4.9398 | 7.82E-07  | 1.30E-05  | 129.3932 | 133.586    | 132.702    | 59.2943    | 82.1391   | 45.7757    |
| ENSG00000181291                                  | TMEM132E    | 92.1484108 | -1.108695153   | 0.22173 | -5.0003 | 5.72E-07  | 9.94E-06  | 107.2747 | 123.238    | 147.557    | 47.2158    | 55.6721   | 71.9333    |
| ENSG00000135333                                  | EPHA7       | 93.3607836 | -1.516470409   | 0.21986 | -6.8974 | 5.30E-12  | 2.48E-10  | 152.6176 | 115.712    | 146.567    | 54.9021    | 50.1961   | 40.1705    |
| ENSG00000183625                                  | CCR3        | 80.0337247 | -1.897577666   | 0.23443 | -8.0943 | 5.76E-16  | 5.13E-14  | 139.3465 | 120.415    | 118.838    | 35.1373    | 33.7683   | 32.6969    |
| ENSG00000181631                                  | P2RY13      | 28.4155885 | -1.010563421   | 0.36929 | -2.7365 | 0.0062092 | 0.0295291 | 32.07182 | 47.0373    | 34.661     | 19.7648    | 17.3405   | 19.6182    |
| ENSG00000153012                                  | LG12        | 27.4343776 | -1.067358625   | 0.38008 | -2.8082 | 0.0049812 | 0.0247027 | 33.17774 | 44.2151    | 33.6707    | 23.0589    | 14.6025   | 15.8814    |
| ENSG00000232480                                  | TGFBI-AS1   | 24.7186442 | -1.682805052   | 0.42699 | -3.9411 | 8.11E-05  | 0.0007836 | 33.17774 | 47.0373    | 32.6804    | 14.2745    | 14.6025   | 6.53939    |
| ENSG00000243721                                  | RPL23AP63   | 28.2751081 | -1.101411561   | 0.38623 | -2.8517 | 0.0043484 | 0.0221231 | 32.07182 | 44.2151    | 39.6126    | 12.0785    | 15.5152   | 26.1576    |
| ENSG00000128322                                  | IGLL1       | 26.0535864 | -1.023050968   | 0.38286 | -2.6721 | 0.0075376 | 0.0344589 | 33.17774 | 31.0446    | 40.6029    | 16.4706    | 20.0785   | 14.9472    |
| ENSG00000232422                                  | KNOP1P4     | 23.5731254 | -1.035439331   | 0.40485 | -2.5576 | 0.01054   | 0.0453477 | 36.49552 | 29.1631    | 29.7094    | 10.9804    | 17.3405   | 17.7498    |
| ENSG00000104218                                  | CSPP1       | 1963.22444 | -0.15807164    | 0.06137 | -2.5755 | 0.0100087 | 0.0435203 | 2120.058 | 2185.35    | 1906.36    | 1868.87    | 1850.87   | 1847.84    |
| ENSG00000227274                                  | RNU2-63P    | 23.8606376 | -1.522495048   | 0.41287 | -3.6876 | 0.0002264 | 0.0018677 | 40.91921 | 36.6891    | 28.7191    | 10.9804    | 12.7772   | 13.0788    |
| ENSG00000212163                                  | SNORD91A    | 25.6850497 | -1.033595069   | 0.41013 | -2.5202 | 0.0117298 | 0.0493652 | 39.81329 | 36.6891    | 26.7385    | 23.0589    | 9.12657   | 18.684     |
| ENSG00000264229                                  | RNU4ATAC    | 32.9343923 | -1.039407002   | 0.34296 | -3.0307 | 0.0024398 | 0.0137981 | 50.87254 | 40.4521    | 41.5932    | 23.0589    | 17.3405   | 24.2892    |
| ENSG00000164107                                  | HAND2       | 32.8757747 | -1.134042773   | 0.34761 | -3.2624 | 0.0011047 | 0.0071171 | 56.40216 | 38.5706    | 40.6029    | 21.9608    | 19.1658   | 20.5524    |
| ENSG00000102924                                  | CBLN1       | 29.7085901 | -1.077588891   | 0.36622 | -2.9425 | 0.0032561 | 0.0174747 | 44.23699 | 33.8668    | 42.5835    | 25.255     | 16.4278   | 15.8814    |
| ENSG00000138772                                  | ANXA3       | 32.5801694 | -1.104795578   | 0.35916 | -3.076  | 0.0020978 | 0.0121765 | 48.66069 | 49.8595    | 34.661     | 25.255     | 13.6899   | 23.355     |
| ENSG00000103534                                  | TMC5        | 41.6362064 | -1.081108857   | 0.30544 | -3.5395 | 0.0004009 | 0.0030442 | 66.35548 | 48.9188    | 54.4673    | 27.4511    | 26.467    | 26.1576    |
| ENSG00000174727                                  | IGF1        | 3.78E+01   | -1.559730689   | 0.33296 | -4.6844 | 2.808E-06 | 4.032E-05 | 67.46141 | 50.8002708 | 51.4963691 | 17.5688749 | 17.340481 | 22.4207643 |
| ENSG0000034053                                   | APBA2       | 36.7593474 | -1.16209464    | 0.33219 | -3.4983 | 0.0004683 | 0.0034732 | 58.61401 | 47.978     | 45.5545    | 29.6471    | 20.0785   | 18.684     |
| ENSG00000249307                                  | LINC01088   | 38.386322  | -1.125207759   | 0.3356  | -3.3528 | 0.0008    | 0.0054284 | 54.19031 | 54.5633    | 49.5157    | 16.4706    | 20.0785   | 35.4995    |
| ENSG00000225536                                  | STIP1P3     | 33.3462525 | -1.053589342   | 0.36262 | -2.9055 | 0.0036667 | 0.0192542 | 49.76661 | 43.2743    | 42.5835    | 10.9804    | 30.1177   | 23.355     |
| ENSG00000130775                                  | THEMIS2     | 254        |                |         |         |           |           |          |            |            |            |           |            |

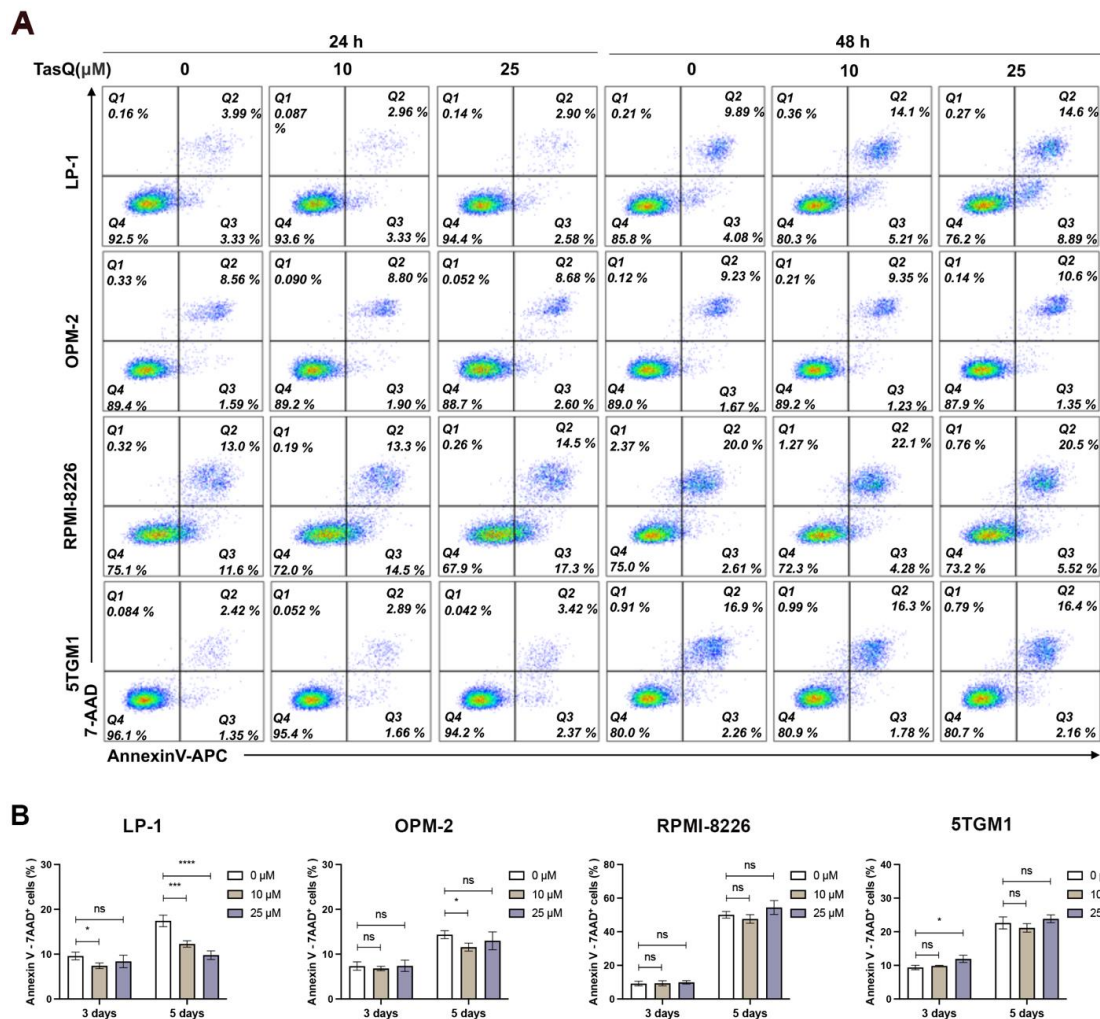

**Supplemental Figure 1. Tasquinimod has no effect on MM cell apoptosis.** (A) MM cell lines (LP-1, OPM-2, RPMI8226, 5TGM1) were treated with tasquinimod (TasQ) (10, 25 μM) for 24 h and 48 h. Apoptosis was detected by flow cytometry using an Annexin V/7-AAD staining and representative figures (including gating strategy) are shown. (B) MM cell lines were treated with tasquinimod (10, 25 μM) for 3 and 5 days. Apoptosis was analysed by Annexin V/7-AAD staining (n=4). \* $p < 0.05$ , \*\* $p < 0.01$ , \*\*\* $p < 0.001$ , \*\*\*\* $p < 0.0001$ , Error bars indicate SD, Ordinary one-way ANOVA.

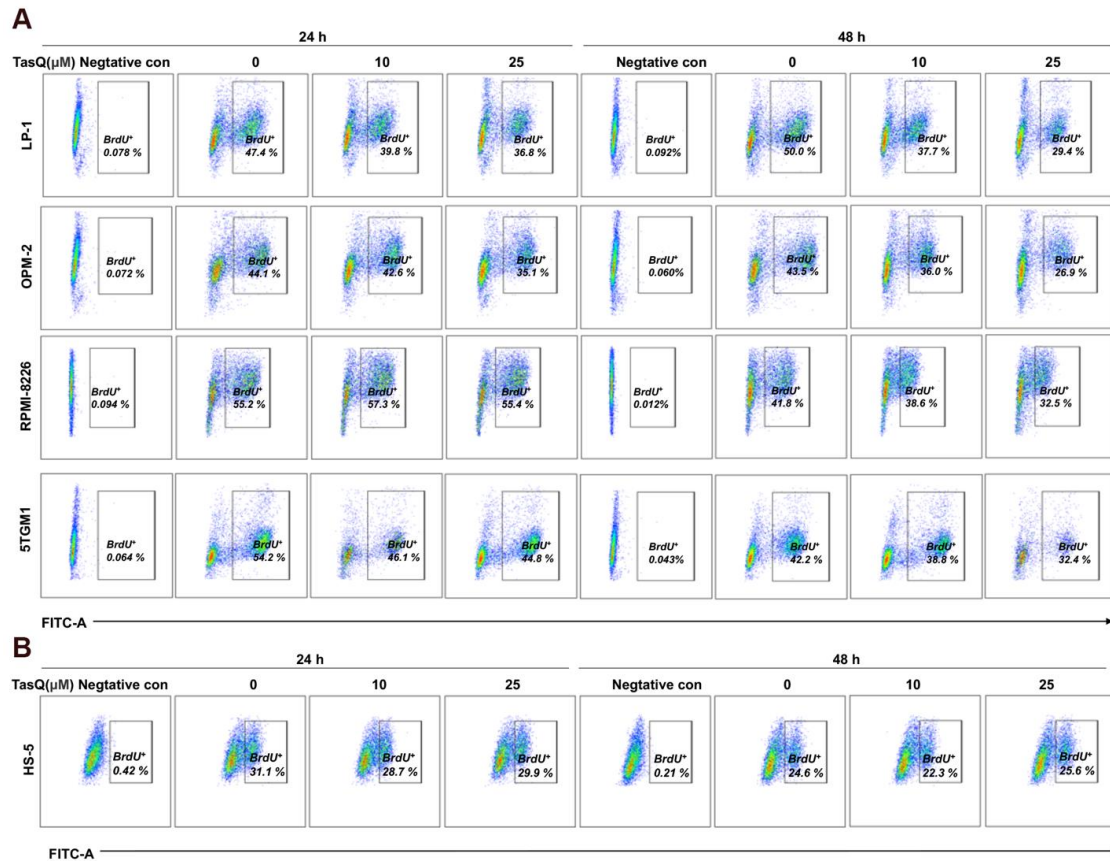

**Supplemental Figure 2. Tasquinimod inhibits MM cell proliferation.** MM cell lines (LP-1, OPM-2, RPMI-8226 and 5TGM1) and the stromal cell line HS-5 were treated with tasquinimod (TasQ) (10, 25  $\mu$ M) for 24 h and 48 h. Cell proliferation was analyzed using BrdU staining and flow cytometry. Representative figures and the gating strategy are shown for MM cell lines (A) and HS-5 cells (B).

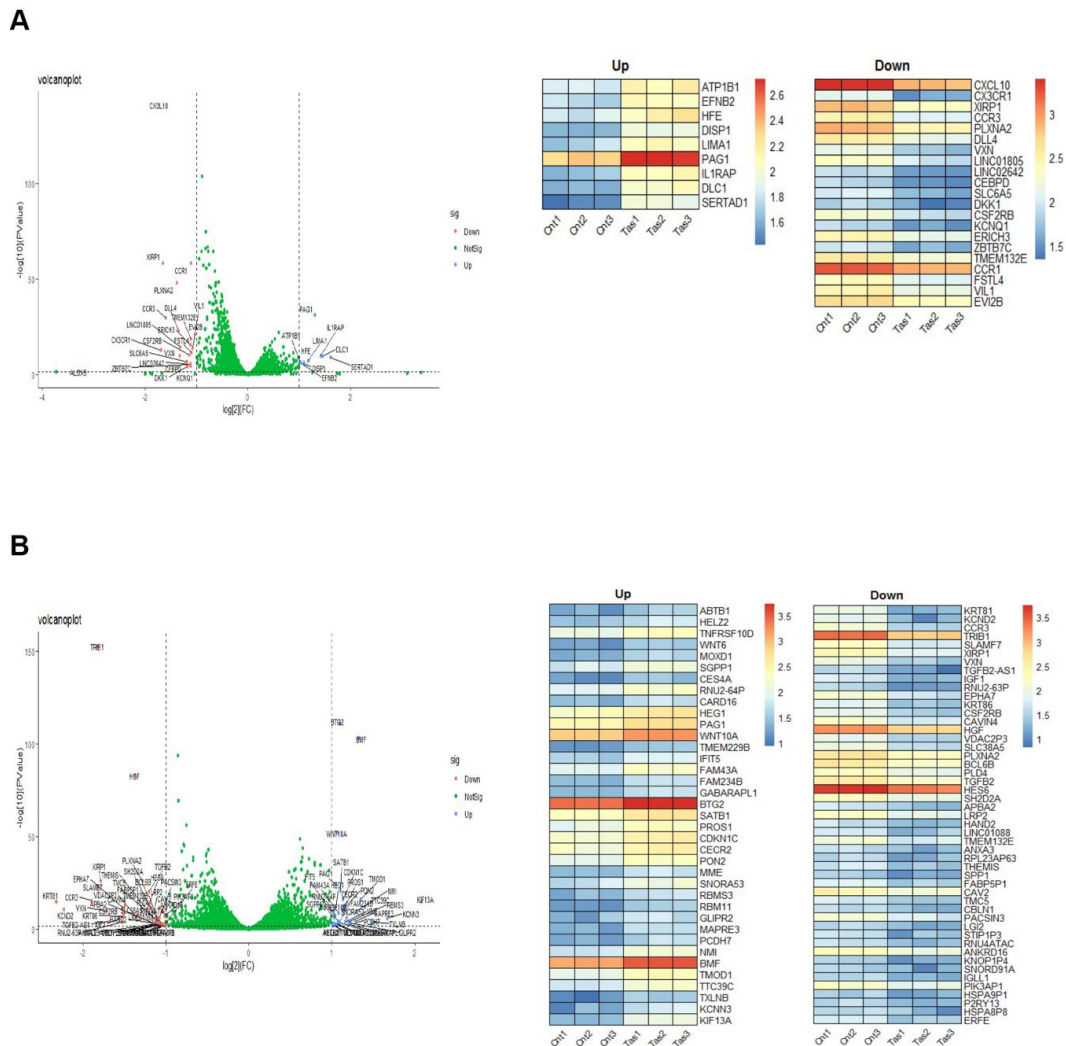

**Supplemental Figure 3. Gene profile analysis in LP-1 cells after tasquinimod treatment.** Volcano plot (left) comparing vehicle versus tasquinimod treatment. Heat map (right) showing differential gene expression in top-ranked genes in LP-1 cells after treatment with either 25  $\mu$ M of tasquinimod (Tas) or DMSO (cnt) for 6 h (A) and 24 h (B). The experiments were done in 3 biological tripates and represented by 3 columns for each condition.





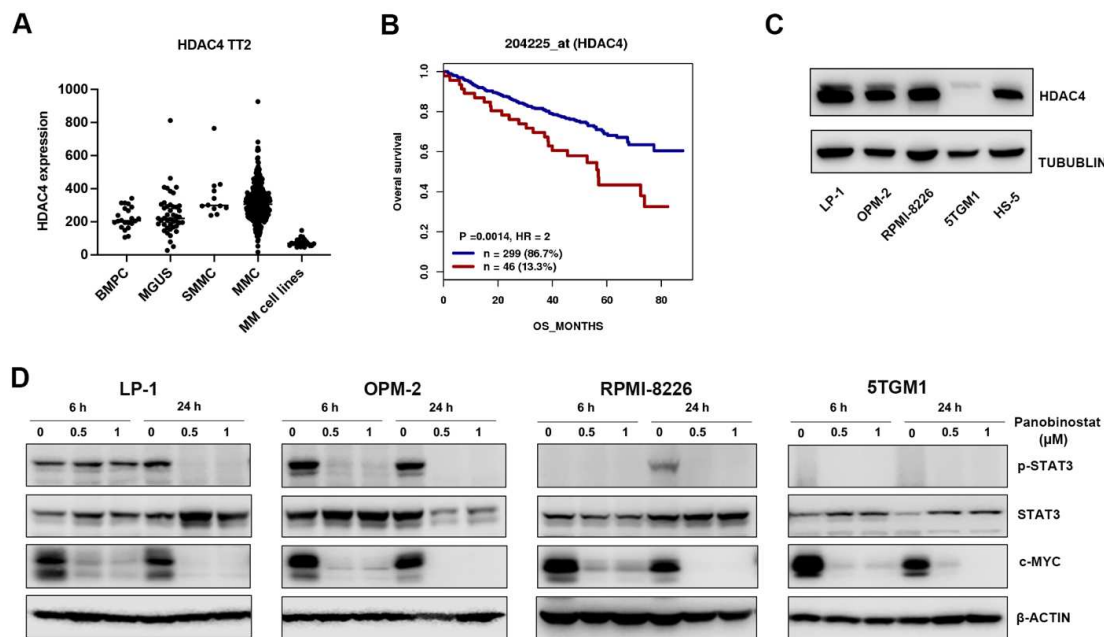

**Supplemental Figure 5. HDAC4 correlates with a poor prognosis and targeting of histone deacetylases using panobinostat results in a similar decrease of c-MYC and p-STAT3.** (A) The scatter plot of HDAC4 expression in BMPC (n=22), MGUS (n=44), SMMC (n=12), MMC (n=345), primary MM cell lines (n=23) samples using gene expression profiling (GEP) data using the online web tool Genomicscape. (B) Kaplan-Meier curve show the correlation of HDAC4 expression with overall survival (OS) in the TT2 MM patient cohort. High and low scores were defined as above and below the median level of expression, respectively. Log-rank test p values are indicated on the curves ( $p = 0.0014$ ). (C) The HDAC4 expression in different MM cell lines and the stromal cell line HS-5 was detected by western blot (n=3). (D) LP-1, OPM-2, RPMI-8226 and 5TGM1 cells were cultured with panobinostat (0.5, 1  $\mu\text{M}$ ) for 6 h and 24 h. Whole-cell lysates were subjected to western blot using anti-phospho-STAT3, anti-STAT3, anti-c-MYC and anti- $\beta$ -ACTIN antibodies (n=3).

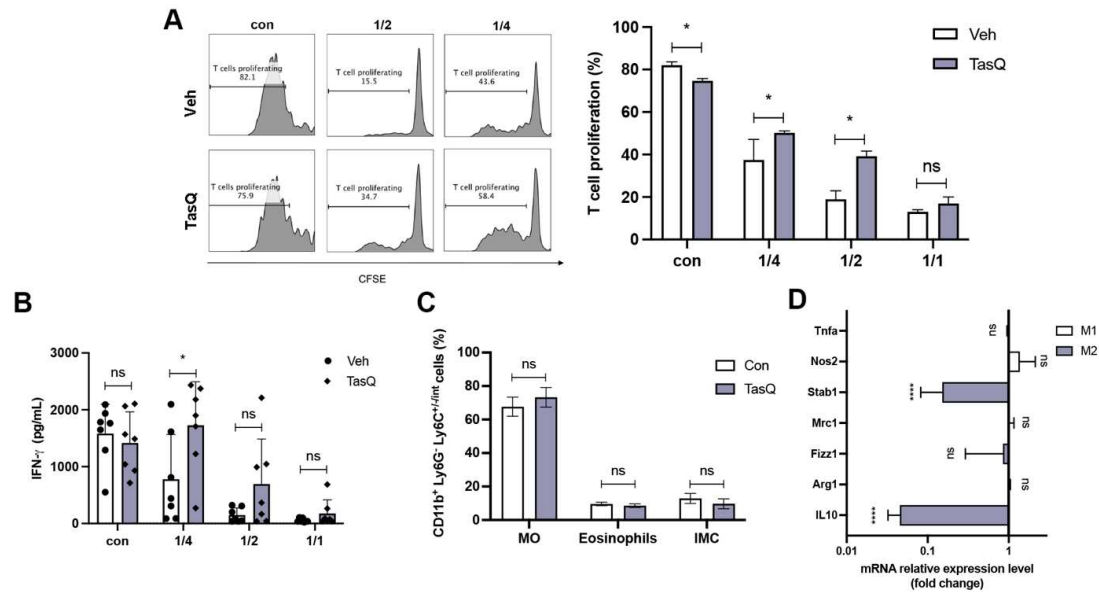

**Supplemental Figure 6. Tasquinimod reduces the MDSC suppressive capacity in 5T33MM-derived conditioned medium *in vitro*.** (A) MACS sorted CD11b<sup>+</sup> bone marrow cells were co-cultured in the presence of 5T33MM conditioned medium, CD3/CD28 microbeads and splenic CFSE-labeled T cells of naive mice. MDSC and T cells were co-cultured at a ratio of 1/4, 1/2 and 1/1 respectively. After 72 h, T cell proliferation was analyzed using flow cytometry (n = 3, Mann-Whitey U test). (B) Supernatant was collected from this assay and IFN- $\gamma$  secretion was analyzed using ELISA (n=7, Mann-Whitey U test). (C) CD11b<sup>+</sup> cells were sorted from the bone marrow of the 5T33MM model and treated with vehicle or tasquinimod (TasQ) for 24 h. The MDSC phenotype was evaluated via flow cytometry (n=3, Mann-Whitey U test). (D) CD11b<sup>+</sup> cells were sorted from the bone marrow of the 5T33MM model and treated with vehicle or tasquinimod for 6 h. The mRNA level of genes was measured with RT-qPCR and calculated with the  $\Delta\Delta C$ . The data are expressed relative to their respective controls set to 1 (n=4, Unpaired t-test). \* $p < 0.05$ ; \*\*\*\* $p < 0.0001$ , Error bars indicate SD.

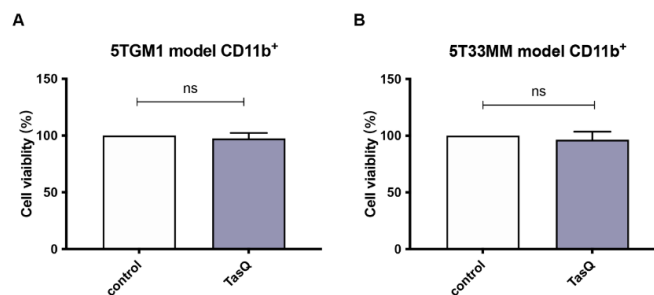

**Supplemental Figure 7. Tasquinimod has no direct effect on the cell viability of MM-derived MDSC *in vitro*.** MACS-sorted CD11b<sup>+</sup> cells from the 5TGM1 (A) and 5T33MM (B) model were treated with/without tasquinimod (TasQ) (25 μM) for 24 h and cell viability was analyzed (n=4). Unpaired t-test. Error bars indicate

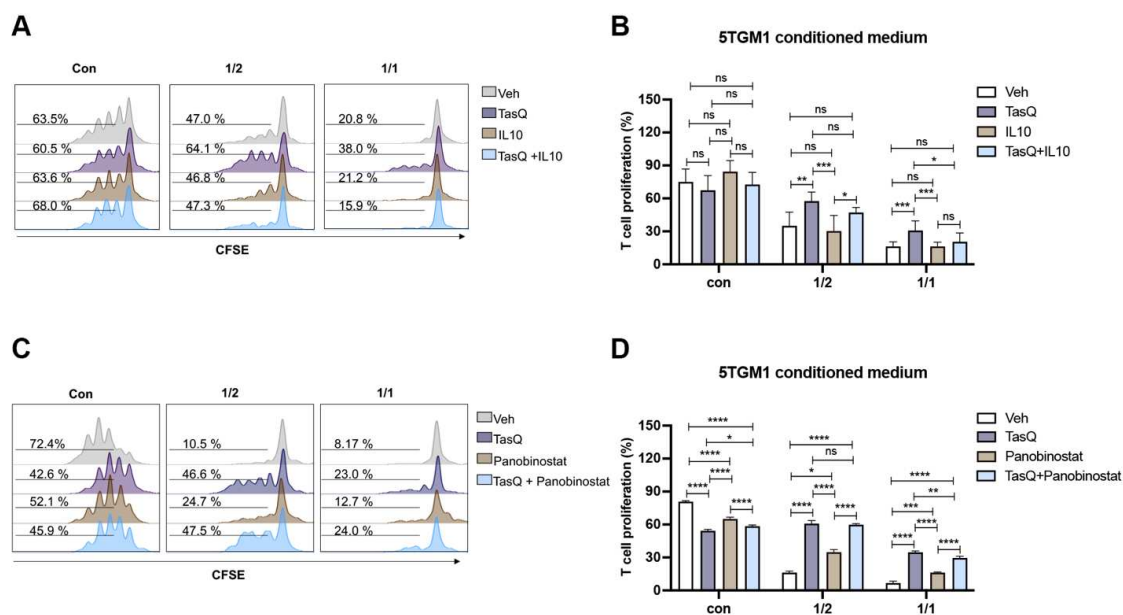

SD.

**Supplemental Figure 8. Recombinant IL-10 and panobinostat change the T cell proliferation capacity in the presence of MDSC, with/without the treatment of tasquinimod.** MACS sorted CD11b<sup>+</sup> bone marrow cells were co-cultured in the presence of 5TGM1 conditioned medium, CD3/CD28 microbeads and splenic CFSE-labeled T cells of naïve mice, with/without tasquinimod (TasQ) (25 μM). MDSC and T cells were co-cultured at a ratio of 1/2 and 1/1 respectively. (A-B) Recombinant IL-10 was added at a concentration of 100 ng/mL and T cell proliferation was analyzed after 72 h (n=6). (C-D) Panobinostat was added to the assay at a concentration

of 10 nM and T cell proliferation was analyzed after 72 h (n=3). \*  $p < 0.05$ , \*\*  $p < 0.01$ , \*\*\*  $p < 0.001$ , \*\*\*\*  $p < 0.0001$ , One-way ANOVA. Error bars indicate SD.

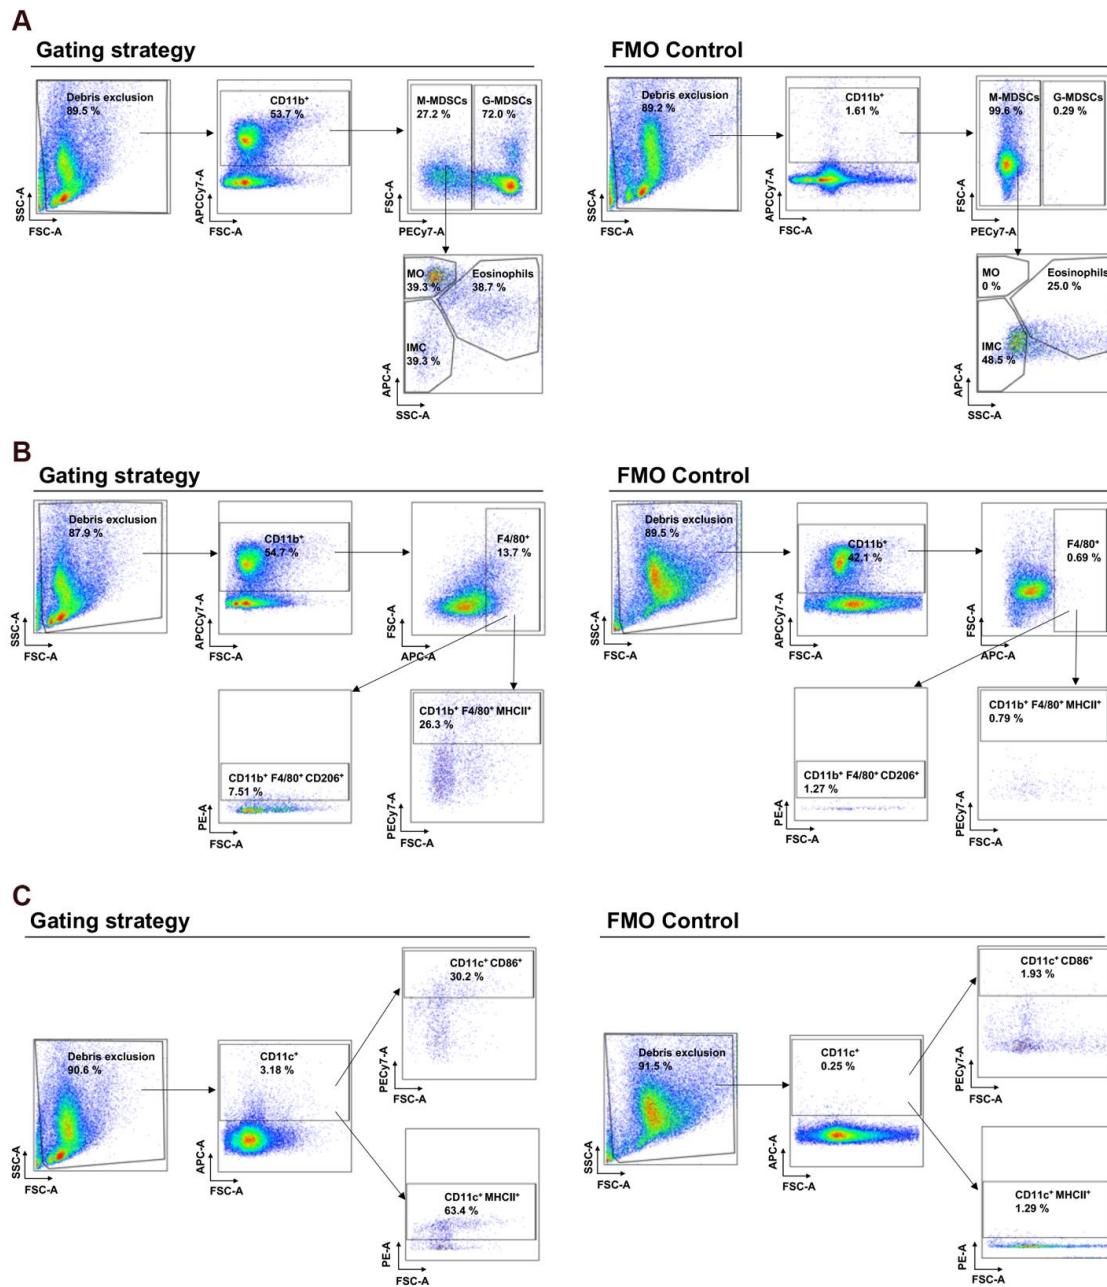

**Supplemental Figure 9. The flow cytometry gating strategy and FMO controls of myeloid cell populations in the 5TGM1 model.** (A) CD11b<sup>+</sup> cells, M-MDSCs, G-MDSCs, Ly6C<sup>hi</sup> inflammatory monocytes (MO), Ly6C<sup>intermediate</sup> eosinophils, and Ly6C<sup>low</sup> immature myeloid cells (IMC). (B) Macrophages. (C) Dendritic cells.

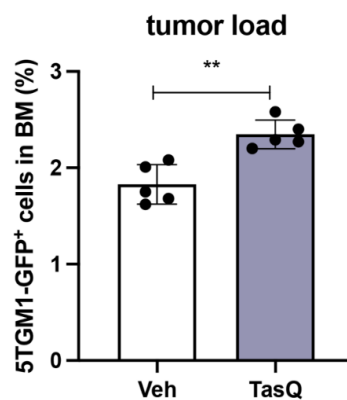

**Supplemental Figure 10. The percentage eGFP positive tumor cells in the bone marrow of tasquinimod-treated 5TGM1 mice after 10 days.** 6-week-old C57BL/KaLwRij mice were inoculated with  $1.0 \times 10^6$  5TGM1-eGFP cells on day 0 and treatment with tasquinimod (TasQ, 30 mg/kg in daily drinking water) started on day 1 (n=5/group). At day 10, all mice were sacrificed to investigate immune cell populations using flow cytometry. \*\* $p < 0.01$ , Error bars indicate SD, Mann-Whitey U test.
