# Supplementary figures and images for: Tasquinimod suppresses tumor cell growth and bone resorption by targeting immunosuppressive myeloid cells and inhibiting c-MYC expression in multiple myeloma
Source: PubMed Central journal article supplement — J Immunother Cancer. 2023 Jan 17;11(1):e005319. doi: 10.1136/jitc-2022-005319 (PMC9853259; doi:10.1136/jitc-2022-005319), 2023-01-17

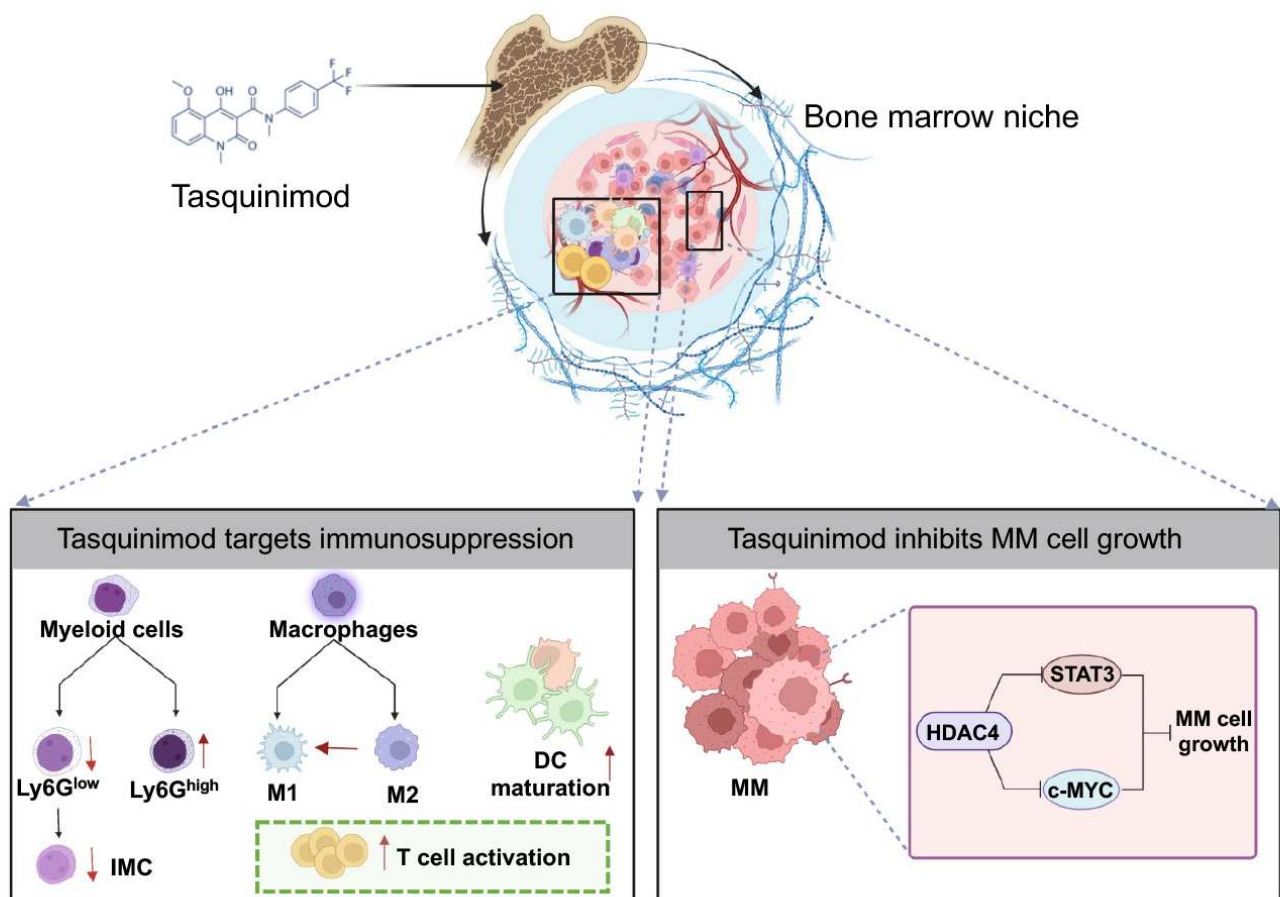

Supplement: jitc-2022-005319supp001.pdf [file jitc-2022-005319supp001.pdf]
